# Supplementary material for: OsJAZ13 Negatively Regulates Jasmonate Signaling and Activates Hypersensitive Cell Death Response in Rice
Source: PubMed Central journal article supplement (PMC7352843; doi:10.3390/ijms21124379), 2020-06-19
Supplement: ijms-21-04379-s001.pdf [file ijms-21-04379-s001.pdf]

**Figure S1**

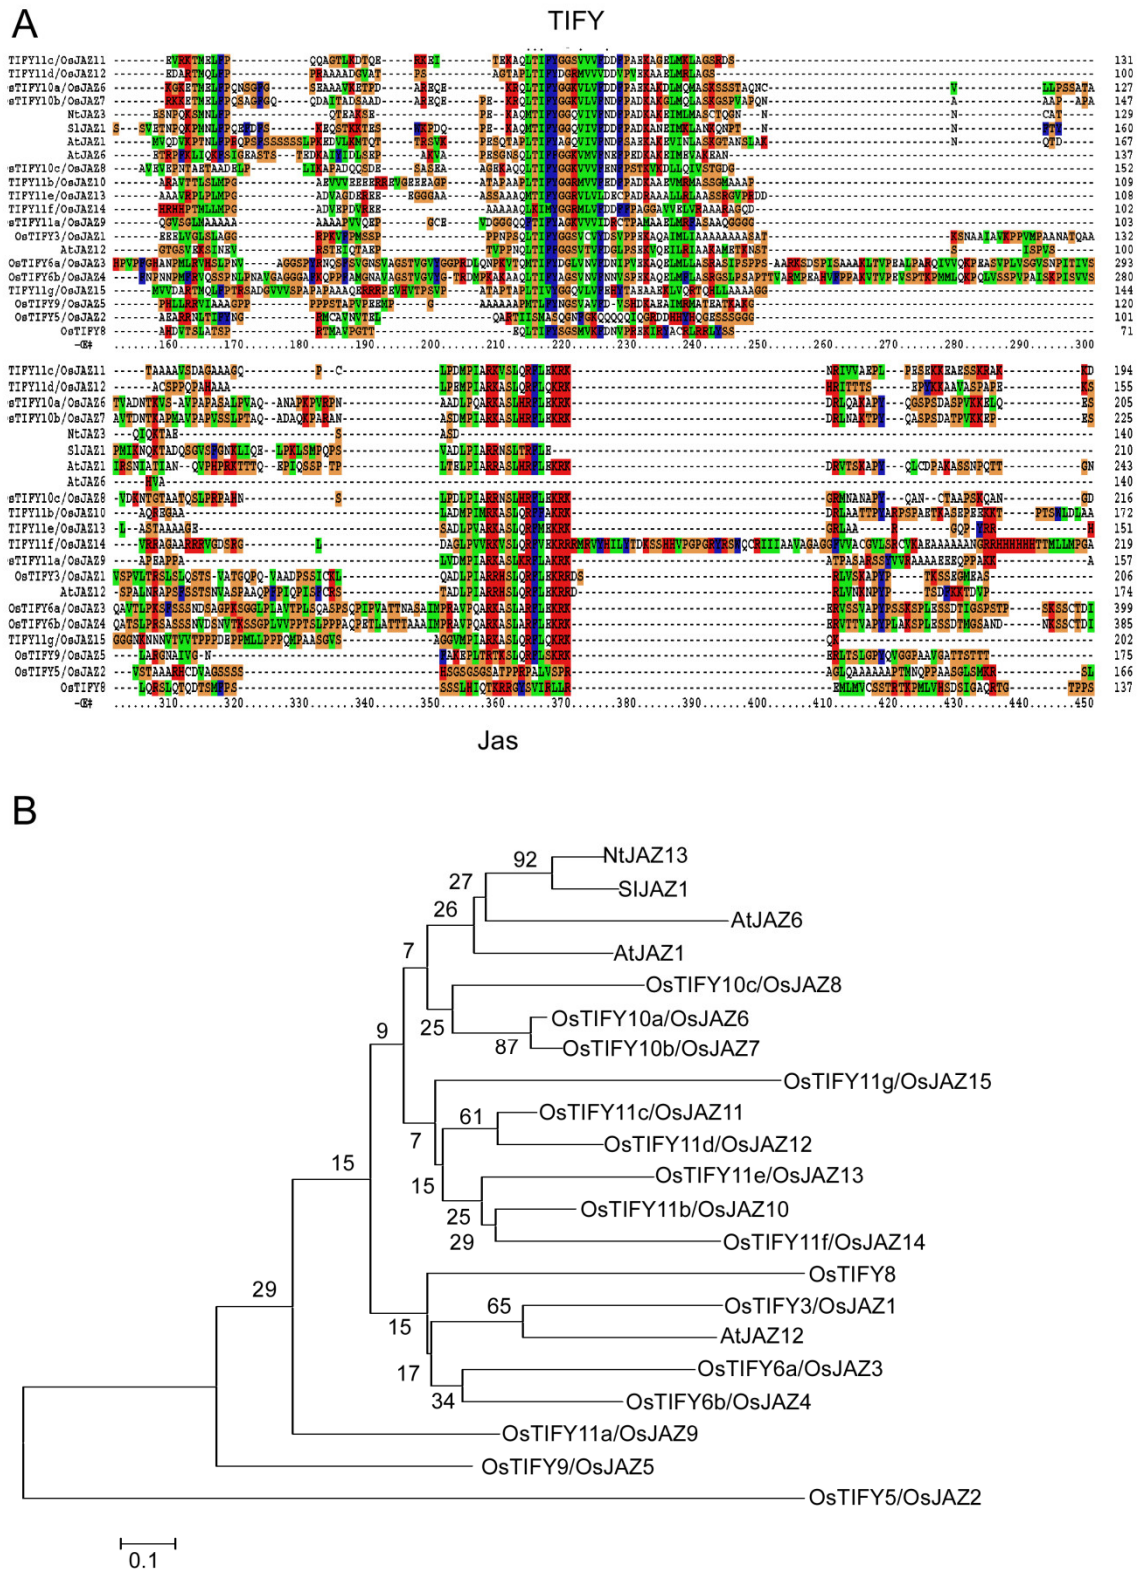

**Figure S1.** Amino acid sequence and phylogenetic analysis of rice, *Arabidopsis*, tomato, and tobacco JAZ proteins. (A) Amino acid sequences were aligned with ClustalW 1.8. TIFY and Jas indicate the conserved domain of JAZ protein. The incolor alignment depicts amino acids with similar hydrophobicity and was generated. (B) The phylogenetic tree was constructed with MEGA 4.0 using

the neighbor-joining method. The accession number of these proteins are as follows: OsTIFY3/OsJAZ1 (CAE03550.1), OsTIFY5/OsJAZ2 (NP\_001058910.2), OsTIFY6a/OsJAZ3 (NP\_001061849.1), OsTIFY6b/OsJAZ4 (NP\_001063121.1), OsTIFY8 (NP\_001048026.1), OsTIFY9/OsJAZ5 (NP\_001052661.1), OsTIFY10a/OsJAZ6 (NP\_001050322.1), OsTIFY10b/OsJAZ7 (NP\_001060268.1), OsTIFY10c/OsJAZ8 (NP\_001063273.1), OsTIFY11a/OsJAZ9 (NP\_001049166.1), OsTIFY11b (NP\_001049168.1), OsTIFY11c/OsJAZ11 (NP\_001049167.1), OsTIFY11d/OsJAZ12 (NP\_001064513.1), OsTIFY11e/OsJAZ13 (NP\_001064511.1), OsTIFY11f/OsJAZ14 (AAP53565.1), and OsTIFY11g/OsJAZ15 (NP\_001173460.1) are from rice; AtJAZ1 (NP\_564075.1), AtJAZ6 (NP\_565043.1), and AtJAZ12 (NP\_197590.1) are from Arabidopsis; NtJAZ3 (BAG68657.1) is from tobacco; SlJAZ1 (ABU88421.1) is from tomato;

**Supplementary Table S1 Primers used for gene clone and plasmid construction**

| Gene                                          | Primer pairs 5'-3'          |                                   | T <sub>m</sub> (°C) |                | Fragment size (bp) |
|-----------------------------------------------|-----------------------------|-----------------------------------|---------------------|----------------|--------------------|
|                                               | Forward primer              | Reverse primer                    | Forward primer      | Reverse primer |                    |
| <b>Gene clone</b>                             |                             |                                   |                     |                |                    |
| OsJAZ13a                                      | AAGAAGAAATTAACCCGAG         | GGATTAAGCTGACGTGT                 | 51.2                | 50.8           | 628                |
| OsJAZ13b                                      | AAGAAGAAATTAACCCGAG         | GGATTAAGCTGACGTGT                 | 51.2                | 50.8           | 474                |
| OsJAZ13c                                      | AAGAAGAAATTAACCCGAG         | TTATGGGATTAAGCTGACG               | 51.2                | 55.5           | 380                |
| OsNINJA                                       | ACATGGACGATGAGAATG          | CATTGAAACCGTCATACAG               | 52.1                | 52.2           | 1386               |
| OsCOI1                                        | CCTGGTTCGGGCTAGATC          | ACAATCACGCAGGATGCA                | 58.2                | 59.8           | 1855               |
| OsMYC2                                        | ATGAACCTTTGGACGGACGA        | TTGGGTTTCCTCGCTAGA                | 62.8                | 56.9           | 2142               |
| OsTPL                                         | TTCTGTGACCTGTAGAATAGGGTAG   | TGGTTAGTGAATTTGTACCGTG            | 58                  | 57.6           | 3553               |
| <b>Overexpression and antisense</b>           |                             |                                   |                     |                |                    |
| Ox-OsJAZ13a                                   | CGGGATCCAAGAAGAAATTAACCCGAG | GGGGTACCGGATTAAGCTGACGTGT         | 51.2                | 50.8           | 644                |
| Ox-OsJAZ13b                                   | CGGGATCCAAGAAGAAATTAACCCGAG | GGGGTACCGGATTAAGCTGACGTGT         | 51.2                | 50.8           | 490                |
| Ox-AOsJAZ13c                                  | CGGGATCCAAGAAGAAATTAACCCGAG | GGGGTACCTTATGGGATTAAGCTGACG       | 51.2                | 55.5           | 396                |
| Ox-AOsJAZ13d                                  | CGGGATCCAAGAAGAAATTAACCCGAG | GGGGTACCTTACAGTCCGCCGACTC         | 51.2                | 59.8           | 346                |
| Anti-OsJAZ13                                  | CGGGATCCAAGAAGAAATTAACCCGAG | GGGGTACCGGATTAAGCTGACGTGT         | 51.2                | 50.8           | 644                |
| <b>Overexpression fusion OsJAZ13 with YFP</b> |                             |                                   |                     |                |                    |
| YFP-Ox-OsJAZ13a                               | CGGGATCCATGGCGGCGGAGGCGGC   | GAGCTCTCTAGATAGATCTGAGTCCGGAC     | 74.4                | 56.7           | 1244               |
| YFP-Ox-OsJAZ13b                               | CGGGATCCATGGCGGCGGAGGCGGC   | GAGCTCTCTAGATAGATCTGAGTCCGGAC     | 74.4                | 56.7           | 1094               |
| YFP-Ox-OsJAZ13d                               | CGGGATCCATGGCGGCGGAGGCGGC   | GAGCTCTCTACAGGTCCGCCGACTC         | 74.4                | 61.4           | 1076               |
| <b>Subcellular location</b>                   |                             |                                   |                     |                |                    |
| YFPOsJAZ13a                                   | CATGCCATGGCGGCGGAGGCGGC     | CATGCCATGGAGAGCGCGAGCGCGA         | 74.4                | 72.2           | 511                |
| YFPOsJAZ13b                                   | CATGCCATGGCGGCGGAGGCGGC     | CATGCCATGGAGAGCGCGAGCGCGA         | 74.4                | 72.2           | 365                |
| YFPOsJAZ13c                                   | CATGCCATGGCGGCGGAGGCGGC     | CATGCCATGGATGGGATTAAGCTGACGTG     | 74.4                | 65.3           | 293                |
| YFPOsJAZ13d                                   | CATGCCATGGCGGCGGAGGCGGC     | CATGCCATGGAGAGCGCGAGCGCGA         | 74.4                | 72.2           | 347                |
| <b>Y2H assay</b>                              |                             |                                   |                     |                |                    |
| Y2HOsJAZ13a                                   | GAATTCATGGCGGCGGAGGCG       | CGGGATCCCAGCGCGAGCGCGAG           | 68.2                | 69.5           | 513                |
| Y2HOsJAZ13b                                   | GAATTCATGGCGGCGGAGGCG       | CGGGATCCCAGCGCGAGCGCGAG           | 68.2                | 69.5           | 363                |
| Y2HOsJAZ13c                                   | GAATTCATGGCGGCGGAGGCG       | CGGGATCCCTGGGATTAAGCTGACG         | 68.2                | 54.3           | 291                |
| Y2HOsJAZ13d                                   | GAATTCATGGCGGCGGAGGCG       | CGGGATCCCAGCGAGATCGTCGCG          | 68.2                | 66.5           | 345                |
| Y2HBDcoI                                      | GAATTCATGGGTGGCGAGGTGC      | GGATCCCTCACGCAGGATGCAAG           | 61.8                | 57.4           | 1801               |
| Y2HBDOsMYC2                                   | CGGAATTCATGAACCTTTGGACGGA   | CCCCGGGTTACCGGGCGGCGGTG           | 54.6                | 67.6           | 2157               |
| Y2HNADMYC2                                    | CGGAATTCATGAACCTTTGGACGGA   | CCCCGGGTTACTGCTGCTGCTGCTG         | 54.6                | 57.5           | 1044               |
| Y2HCADMYC2                                    | CGGAATTCATGAAGACTCCATCTCCG  | CCCCGGGTTACCGGGCGGCGGTG           | 57.6                | 67.6           | 1278               |
| Y2HosTPL                                      | CGGAATTCATGTCGTCGCTGAGCCGG  | GAAGATCTTTATCTTTCTGTTGATCAGAACTTG | 66                  | 60.1           | 3418               |
| Y2HADNINJA                                    | CGGAATTCATGGACGATGAGAATGGC  | GAAGATCTTTAGTTTTGGGCTGAGGC        | 56.8                | 56.4           | 1372               |
| <b>Gus promoter</b>                           |                             |                                   |                     |                |                    |
| POsJAZ13                                      | TCTGAAGCCGACGCCT            | ACCAGCCGCTGCTTG                   | 59.1                | 57.9           | 1890               |
| APOsJAZ13                                     | ACGCGTGCAGCTCTGAAGCCGACGCCT | TCCCCGGGACCAGCCGCTGCTTG           | 59.1                | 57.9           | 1909               |

Note: underlined sequences indicate restriction enzyme sites.

## Supplementary Table S2 Primers used for RT-PCR and qRT-PCR

| Gene           | Primer pairs 5'-3'       |                             | T <sub>m</sub> (°C) |                | Fragment size (bp) | E (%) |
|----------------|--------------------------|-----------------------------|---------------------|----------------|--------------------|-------|
|                | Forward primer           | Reverse primer              | Forward primer      | Reverse primer |                    |       |
| <b>RT-PCR</b>  |                          |                             |                     |                |                    |       |
| OsJAZ13        | AAGAAGAAATTAACCCGAG      | TTATGGGATTAAGCTGACG         | 51.2                | 55.5           | 632                | -     |
| HSR203J        | CGTACGTACGGCAGCAATG      | TGTACGGGTGGTCCTTGG          | 61.3                | 60.4           | 833                | -     |
| ACTIN          | TCATGAAGATCCTGACGGAG     | AACAGCTCCTCTGGCTTAG         | 58.7                | 56.5           | 602                | -     |
| <b>qRT-PCR</b> |                          |                             |                     |                |                    |       |
| qOsMYC2        | AGGACCTCATGATCCAGCA      | TTGGGTTTCTCGCTAGA           | 59.1                | 56.9           | 140                | 94.2  |
| qOsEIL1        | GAGGTGGTCTGGTATGGA       | CGAAGCCGAGGTTCTTGTC         | 59.4                | 60.9           | 99                 | 91.6  |
| qOsERF1        | ACGCACAGTGAAGCAAGCA      | GCCTGATCCCTTTGCCGTC         | 61.8                | 65.3           | 129                | 90.6  |
| qOsERF047      | TCTTCCTGCTGCGATGTATG     | AACACGGGTAGGAGAAGGAC        | 60                  | 58.1           | 92                 | 103.1 |
| qOsERF077      | ATCTGAGCCTCGGGATGT       | GAGCTACCTCCTTCTTGACG        | 61.5                | 56.7           | 138                | 101.8 |
| qOsERF130      | ACGTACGTGAGTAGAGCATCA    | TGCTCTCCACTCCCACAT          | 56                  | 57.5           | 102                | 93.1  |
| qOsNPR1        | AAACCGGATCAGTTTCATCA     | AAGAACACTTAGCTCGGATGAC      | 58                  | 57.6           | 117                | 101.3 |
| qOsPR1b        | GGCAACTTCGTCGGACAGA      | CCGTGGACCTGTTTACATTTCA      | 62.4                | 63.1           | 122                | 103.7 |
| qOsPR2         | CGATTACGTTTCTCCGA        | GGGCCATACAGAGTACATGC        | 57.2                | 58             | 121                | 95.7  |
| qOsPR31        | GAGCTATAGCCTCAACCTCA     | TGCGTATGAACGGATCTC          | 54.5                | 55.5           | 120                | 96.1  |
| qOsPR4         | AGCGCATATTGTGCCACATG     | GGATACACTTGCCACACGAGTCT     | 63                  | 62.7           | 121                | 96.3  |
| qOsPR5         | CAACAGCAACTACCAAGTCGTCTT | CAAGGTGTCGTTTTATTCATCAACTTT | 61.9                | 62.7           | 125                | 92.7  |
| qOsPR5-Like    | GCAACAGAAACACTAACACG     | TGTACCCGCACTTGTTGA          | 54.4                | 57             | 135                | 95.7  |
| qOsPR10        | CCCTGCCGAATACGCCTAA      | CTCAAACGCCACgAgAATTTG       | 63.2                | 62.9           | 121                | 102.2 |
| qOsAOS1        | CCTGTTCCGGCCTCATGGAGAA   | GGAGCGAGTGGAGGAGCGT         | 66.9                | 65.3           | 239                | 104.6 |
| qOsAOC1        | CAGATCGAGCTGCCTGAT       | GCAGGGAGGAAACAAATATC        | 57.5                | 56.2           | 108                | 97.0  |
| QNR2           | TGGAGAAGATGGGCTATGA      | ACTCGAGAGAGCTCCAAACT        | 56.7                | 55.9           | 142                | 95.9  |
| qNADP-ME       | AGCCTATGACCTTGATTG       | AGCCAAATGAAGCTGTACAC        | 55.1                | 55.5           | 139                | 97.6  |

Note: T<sub>m</sub>: melting temperatures; E: PCR efficiency (%)
